# Supplementary material for: A CTAB-assisted PANI-MoS 2 nanosheet flower morphology for the highly sensitive electrochemical detection of hydrazine
Source: Royal Society of Chemistry journal article supplement (doi:10.1039/d3ra06003a), 2023-01-01
Supplement: d3ra06003a1.pdf [file d3ra06003a1.pdf]

### Supplementary Information

#### CTAB assisted PANI-MoS<sub>2</sub> nanosheets flower morphology for highly sensitive electrochemical detection of hydrazine

Ganesha H, Veeresh S, Nagaraju Y S, Devendrappa H\*

Department of Physics Mangalore University, Mangalagangothri-574199 India,

Corresponding author E-mail: [dehu2010@gmail.com](mailto:dehu2010@gmail.com)

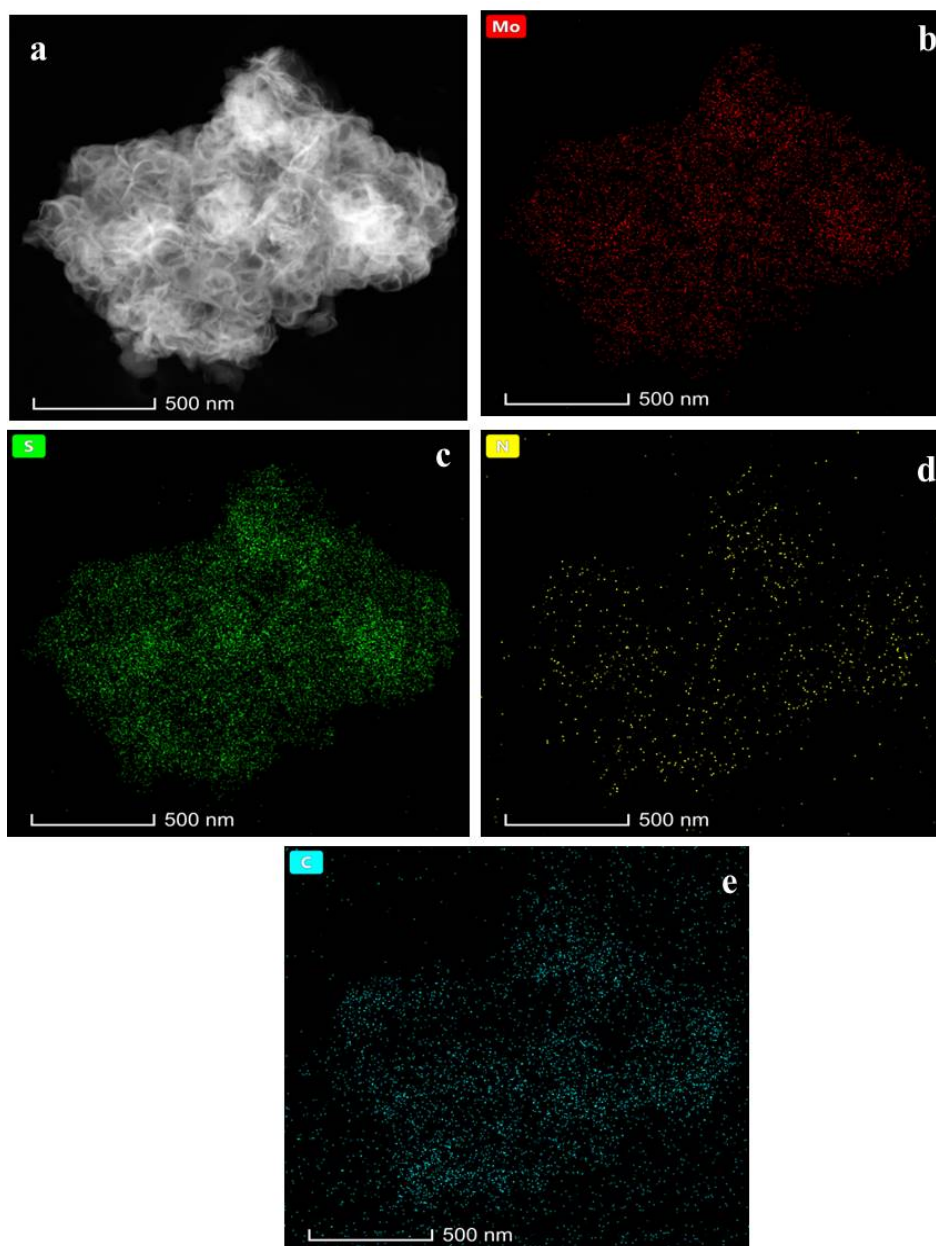

**Figure S1.** Shows the HR-STEM and elemental mapping images of (a) CPANI-MoS<sub>2</sub> composite (b-e) elemental mapping of molybdenum (Mo), sulphur (S), nitrogen (N), and carbon (C).

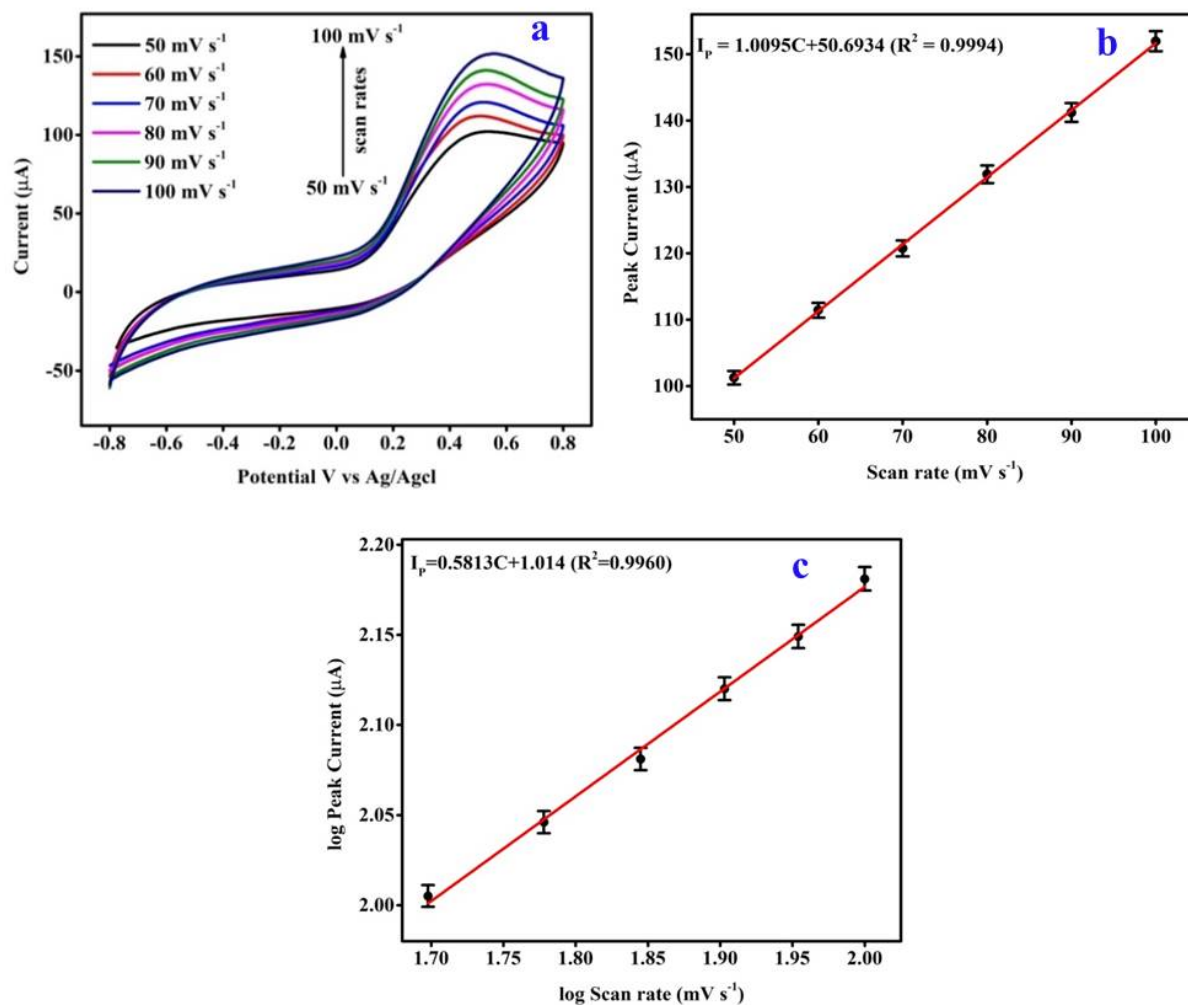

**Figure S2.** (a) The CV curve of CPANI-MoS<sub>2</sub> GCE was measured at various scan rate (b) calibration plot of the peak current of hydrazine against scan rate and (c) log peak current function of log scan rate.

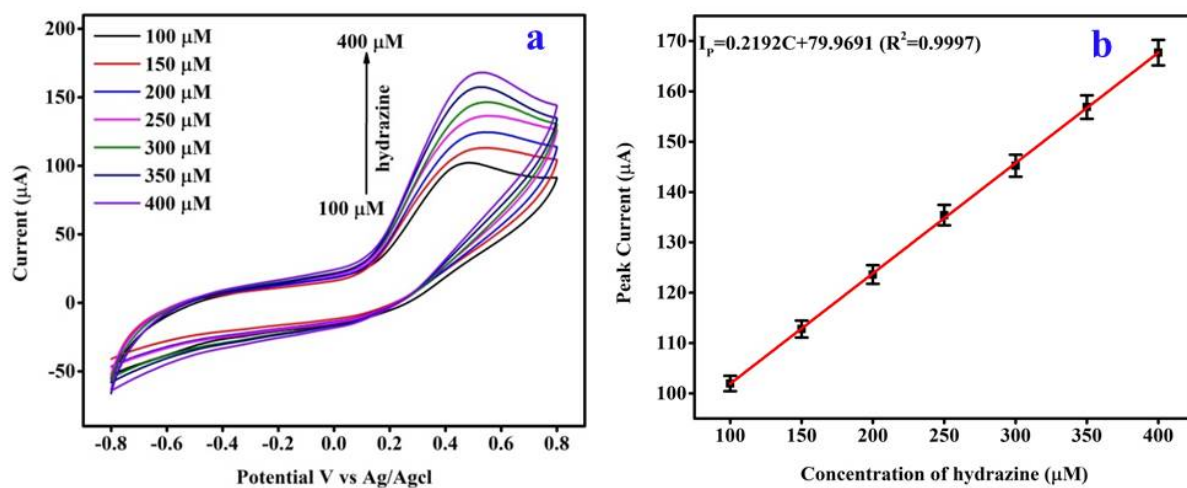

**Figure S3.** (a) illustrates the CV curve of CPANI-MoS<sub>2</sub> GCE in the presence of a different concentration of hydrazine with an applied scan rate at 50 mV s<sup>-1</sup> and (b) a calibration plot of peak current against a different concentration of hydrazine analyte.
